# Supplementary material
Source: PubMed Central journal article supplement (PMC7549255)
Supplement: ml9b00555_si_001.pdf [file ml9b00555_si_001.pdf]

# Supporting Information

## Harmaline Analogs as Substrate-Selective Cyclooxygenase-2 Inhibitors

Md. Jashim Uddin<sup>†\*</sup>, Shu Xu<sup>†</sup>, Brenda C. Crews<sup>†</sup>, Ansari M. Aleem<sup>†</sup>, Kebreab Ghebreselasie<sup>†</sup>, Surajit Banerjee<sup>\*||</sup>, and Lawrence J. Marnett<sup>†\*</sup>

<sup>†</sup>A. B. Hancock, Jr., Memorial Laboratory for Cancer Research, Department of Biochemistry, Chemistry and Pharmacology, Vanderbilt Institute of Chemical Biology, Center for Molecular Toxicology and Vanderbilt-Ingram Cancer Center, Vanderbilt University School of Medicine, Nashville, Tennessee 37232, USA

<sup>\*</sup>Department of Chemistry and Chemical Biology, Cornell University, Ithaca, NY 14853, USA

<sup>||</sup>Northeastern Collaborative Access Team, Argonne National Laboratory, Argonne, IL 60439, USA

\*Corresponding Authors, M. J. U. at email: [Jashim.uddin@vanderbilt.edu](mailto:Jashim.uddin@vanderbilt.edu), or phone: 615-484-8674, and L.J.M. at email: [larry.marnett@vanderbilt.edu](mailto:larry.marnett@vanderbilt.edu)

### List of Contents

|                                                                |      |
|----------------------------------------------------------------|------|
| 1. Chemical synthesis and spectroscopic characterization ..... | pg#2 |
| 2. LC-MS/MS Assay.....                                         | pg#6 |
| 3. X-ray data.....                                             | pg#7 |

## 1. Chemical synthesis, spectroscopic, and chromatographic characterization

**6-Methoxy-1-methyl-4,9-dihydro-3H-pyrido[3,4-*b*]indole (1).** To a stirred solution of 2-(5-methoxy-1*H*-indol-3-yl)ethan-1-amine (1.9 g, 10 mmol) in CH<sub>2</sub>Cl<sub>2</sub> (100 mL) was added triethylamine (1 g, 10 mmol) followed by acetyl chloride (0.7 g, 10 mmol) at 0 °C. After stirring 5 h at room temperature, toluene (100 mL) followed by POCl<sub>3</sub> (19.68 g, 129 mmol, 12 mL) were added dropwise, and the resultant reaction mixture was refluxed for 7 h. The reaction mixture was cooled to room temperature, and the pH was adjusted to 9 by adding a saturated aqueous Na<sub>2</sub>CO<sub>3</sub> solution. The product was extracted with CH<sub>2</sub>Cl<sub>2</sub> (3x50 mL). After evaporation of the organic layer, the gummy mass was purified by silica gel column chromatography using CHCl<sub>3</sub>:MeOH:NH<sub>4</sub>OH (35:7:1) to give 1 g of pure 6-methoxy-1-methyl-4,9-dihydro-3H-pyrido[3,4-*b*]indole (1) in 50% yield. <sup>1</sup>H NMR (500 MHz, DMSO-*d*<sub>6</sub>) δ 1.40 (t, *J* = 7.5 Hz, 2H), 1.90 (s, 3H), 2.32 (t, *J* = 7.5 Hz, 2H), 3.83 (s, 3H), 6.92 (dd, *J* = 9.1, 2.9 Hz, 1H), 7.11 (d, *J* = 2.9 Hz, 1H), 7.53 (d, *J* = 9.1 Hz, 1H), 11.63 (br s, 1H). Mass (ESI) (M+H)<sup>+</sup> calcd for 215.11; found 215.21. HRMS *m/z* calcd for [C<sub>13</sub>H<sub>14</sub>N<sub>2</sub>O + H]<sup>+</sup> 215.1125; found, 215.1156. HPLC purity 99.9%.

**7-Methoxy-1-methyl-4,9-dihydro-3H-pyrido[3,4-*b*]indole (2).** To a stirred solution of 2-(6-methoxy-1*H*-indol-3-yl)ethan-1-amine (1.9 g, 10 mmol) in CH<sub>2</sub>Cl<sub>2</sub> (100 mL) was added triethylamine (1 g, 10 mmol) followed by acetyl chloride (0.7 g, 10 mmol) at 0 °C. After stirring 5 h at room temperature, toluene (100 mL) followed by POCl<sub>3</sub> (19.68 g, 129 mmol, 12 mL) were added dropwise, and the resultant reaction mixture was refluxed for 7 h. The reaction mixture was cooled to room temperature, and the pH was adjusted to 9 by adding a saturated aqueous Na<sub>2</sub>CO<sub>3</sub> solution. The product was extracted with CH<sub>2</sub>Cl<sub>2</sub> (3x50 mL). After evaporation of the organic layer, the gummy mass was purified by silica gel column chromatography using CHCl<sub>3</sub>:MeOH:NH<sub>4</sub>OH (35:7:1) to give 1.12 g of pure 7-methoxy-1-

methyl-4,9-dihydro-3*H*-pyrido[3,4-*b*]indole (**2**) in 56% yield. <sup>1</sup>H NMR (500 MHz, DMSO-*d*<sub>6</sub>) δ 1.39 (t, *J* = 7.5 Hz, 2H), 1.92 (s, 3H), 2.33 (t, *J* = 7.5 Hz, 2H), 3.86 (s, 3H), 6.90-6.95 (m, 2H), 7.53 (d, *J* = 9.2 Hz, 1H), 11.63 (br s, 1H). HRMS *m/z* calcd for [C<sub>13</sub>H<sub>14</sub>N<sub>2</sub>O + H]<sup>+</sup> 215.1125; found, 215.1163. HPLC purity 99.9%.

**9-(4-Chlorobenzyl)-6-methoxy-1-methyl-4,9-dihydro-3*H*-pyrido[3,4-*b*]indole (**3**).** To a cold (0 °C) stirred slurry of NaH (0.3 g, 12.5 mmol) in DMF (50 mL) was added 6-methoxy-1-methyl-4,9-dihydro-3*H*-pyrido[3,4-*b*]indole (1.07 g, 5 mmol). After stirring for 1 h at 0 °C, 1-(bromomethyl)-4-chlorobenzene (1 g, 5 mmol) was added, and the mixture was stirred 1 h at room temperature. The reaction mixture was then poured into a crushed ice/water bath (100 g) and acidified with 10% aqueous HCl (pH 4). The resultant solid was filtered, washed with cold water, and dried under vacuum. The crude product was purified using silica gel column chromatography (35 : 7 : 1, CHCl<sub>3</sub> : MeOH : NH<sub>4</sub>OH) to give 1 g pure 9-(4-chlorobenzyl)-6-methoxy-1-methyl-4,9-dihydro-3*H*-pyrido[3,4-*b*]indole (**3**) in 72% yield. <sup>1</sup>H NMR (500 MHz, DMSO-*d*<sub>6</sub>) δ 2.35 (s, 3H), 2.73 (t, *J* = 7.5 Hz, 2H) 3.75 (t, *J* = 7.5 Hz, 2H), 3.83 (s, 3H), 5.81 (s, 2H), 6.72 (dd, *J* = 9.1, 2.9 Hz, 1H), 7.10 (d, *J* = 8.5 Hz, 2H), 7.30 (d, *J* = 8.5 Hz, 2H), 7.53 (d, *J* = 2.9 Hz, 1H), 7.95 (d, *J* = 9.1 Hz, 1H). HRMS *m/z* calcd for [C<sub>20</sub>H<sub>19</sub>ClN<sub>2</sub>O + H]<sup>+</sup> 339.1247; found, 339.1239. HPLC purity 99.9%.

**9-(4-Chlorobenzyl)-7-methoxy-1-methyl-4,9-dihydro-3*H*-pyrido[3,4-*b*]indole (**4**).** To a cold (0 °C) stirred slurry of NaH (0.6 g, 25 mmol) in DMF (100 mL) was added 7-methoxy-1-methyl-4,9-dihydro-3*H*-pyrido[3,4-*b*]indole (2.14 g, 10 mmol). After stirring for 1 h at 0 °C, 1-(bromomethyl)-4-chlorobenzene (2.05 g, 10 mmol) was added, and the mixture was stirred 1 h at room temperature. The reaction mixture was then poured into a crushed ice/water bath (100 g) and acidified with 10% aqueous HCl (pH 4). The resultant solid was filtered, washed with cold water, and dried under vacuum. The crude product was purified using silica gel column chromatography (35 : 7 : 1, CHCl<sub>3</sub> : MeOH : NH<sub>4</sub>OH) to give 2.1 g

pure 9-(4-chlorobenzyl)-7-methoxy-1-methyl-4,9-dihydro-3*H*-pyrido[3,4-*b*]indole (**4**) in 64% yield. <sup>1</sup>H NMR (500 MHz, DMSO-*d*<sub>6</sub>) δ 1.36 (t, *J* = 7.5 Hz, 2H), 2.22 (t, *J* = 7.5 Hz, 2H), 3.80 (s, 3H), 6.93 (dd, *J* = 9.1, 2.9 Hz, 1H), 7.12 (d, *J* = 2.9 Hz, 1H), 7.34 (d, *J* = 9.1 Hz, 1H). HRMS *m/z* calcd for [C<sub>20</sub>H<sub>19</sub>ClN<sub>2</sub>O + H]<sup>+</sup> 339.1247; found, 339.1254. HPLC purity 99.9%.

**6-Methoxy-4,9-dihydro-3*H*-pyrido[3,4-*b*]indole-1-carboxylic acid (**5**).** To a stirred solution of 2-(5-methoxy-1*H*-indol-3-yl)ethan-1-amine (1.9 g, 10 mmol) in CH<sub>2</sub>Cl<sub>2</sub> (100 mL) was added triethylamine (1 g, 10 mmol) followed by *t*-butyl 2-chloro-2-oxoacetate (1.65 g, 10 mmol) at 0 °C. After stirring 5 h at room temperature, toluene (100 mL) followed by POCl<sub>3</sub> (19.68 g, 129 mmol, 12 mL) were added dropwise, and the resultant reaction mixture was refluxed for 7 h. The reaction mixture was cooled to room temperature, and the pH was adjusted to 9 by adding a saturated aqueous Na<sub>2</sub>CO<sub>3</sub> solution. The product was extracted with CH<sub>2</sub>Cl<sub>2</sub> (3x50 mL). The combined organic layers were evaporated to dryness to give *tert*-butyl 6-methoxy-4,9-dihydro-3*H*-pyrido[3,4-*b*]indole-1-carboxylate as a gummy mass, to which 2,2,2-trifluoroacetic acid (5 mL) was added. After the reaction mixture was stirred for 1 h at room temperature, it was evaporated to dryness, and the crude product was purified using silica gel column chromatography (35 : 7 : 1, CHCl<sub>3</sub> : MeOH : NH<sub>4</sub>OH) to give 2.2 g of pure 6-methoxy-4,9-dihydro-3*H*-pyrido[3,4-*b*]indole-1-carboxylic acid (**5**) in 90% yield. <sup>1</sup>H NMR (500 MHz, DMSO-*d*<sub>6</sub>) δ 3.78 (s, 3H), 6.59 (dd, *J* = 9.2, 2.4 Hz, 1H), 7.42 (d, *J* = 2.4 Hz, 1H), 7.65 (d, *J* = 8.6 Hz, 2H), 7.80 (d, *J* = 8.6 Hz, 2H), 8.45 (d, *J* = 9.2 Hz, 1H), 11.53 (br s, 1H), 12.63 (s, 1H). HRMS *m/z* calcd for [C<sub>13</sub>H<sub>12</sub>N<sub>2</sub>O<sub>3</sub> - H]<sup>-</sup> 243.0874; found, 243.0869. HPLC purity 99.9%.

**9-(4-Chlorobenzyl)-6-methoxy-4,9-dihydro-3*H*-pyrido[3,4-*b*]indole-1-carboxylic acid (**6**).** To a cold (0 °C) stirred slurry of NaH (0.6 g, 25 mmol) in DMF (100 mL) was added 6-

methoxy-4,9-dihydro-3*H*-pyrido[3,4-*b*]indole-1-carboxylic acid (2.44 g, 10 mmol). After stirring for 1 h at 0 °C, 1-(bromomethyl)-4-chlorobenzene (2 g, 10 mmol) was added, and the mixture was stirred 1 h at room temperature. The reaction mixture was then poured into a crushed ice/water bath (100 g) and acidified with 10% aqueous HCl (pH 4). The resultant solid was filtered, washed with cold water, and dried under vacuum. The crude product was purified using silica gel column chromatography (35 : 7 : 1, CHCl<sub>3</sub> : MeOH : NH<sub>4</sub>OH) to give 2.3 g pure 9-(4-chlorobenzyl)-6-methoxy-4,9-dihydro-3*H*-pyrido[3,4-*b*]indole-1-carboxylic acid (**6**) in 63% yield. <sup>1</sup>H NMR (500 MHz, DMSO-*d*<sub>6</sub>) δ 1.43 (t, *J* = 7.5 Hz, 2H) 2.24 (t, *J* = 7.5 Hz, 2H), 3.85 (s, 3H), 5.84 (s, 2H), 6.71 (dd, *J* = 9.1, 2.9 Hz, 1H), 7.11 (d, *J* = 8.5 Hz, 2H), 7.31 (d, *J* = 8.5 Hz, 2H), 7.54 (d, *J* = 2.9 Hz, 1H), 7.85 (d, *J* = 9.1 Hz, 1H), 12.55 (s, 1H). HRMS *m/z* calcd for [C<sub>20</sub>H<sub>17</sub>ClN<sub>2</sub>O<sub>3</sub> - H]<sup>-</sup> 367.0935; found, 367.0941. HPLC purity 99.9%.

## 2. LC-MS/MS Assay

We evaluated the substrate-selective COX-2 inhibitory activity of compound **3** in presence of both aa and 2-AG. The assay was performed using a reaction mixture containing 15 nM purified murine COX-2, 30 nM heme, 10  $\mu$ M AA and 2-AG, 1  $\mu$ M 5-phenyl-4-pentenyl-1-hydroperoxide (PPHP), and compound **3** or vehicle (DMSO at a final concentration of 5%) in a buffer of 50 mM tris-HCl, pH 8.0, 0.5 mM phenol. following addition of compound **3**, the mixture was incubated for 15-min, and then the reaction was initiated by the addition of both AA and 2-AG together. After 10s, the reaction was quenched by addition of ethyl acetate containing internal standards (PGE<sub>2</sub>-d<sub>4</sub> and PGE<sub>2</sub>g-d<sub>5</sub>) at 0.3  $\mu$ M. analytes of interest were detected by selected reaction monitoring MS/MS using the following transitions: PGE<sub>2</sub>/D<sub>2</sub> *m/z* 370→317; PGE<sub>2</sub>-d<sub>4</sub> *m/z* 374→321; PGE<sub>2</sub>/d<sub>2</sub>-G *m/z* 444→391; PGE<sub>2</sub>-G-d<sub>5</sub> *m/z* 449→396. Analyte peak areas were normalized to those of their deuterated internal standards for the quantification of product formation and inhibition.

**Table 1s.** Statistics of X-ray Data Collection and Structure Refinement

|                                          |  | COX-2•compound 3           |
|------------------------------------------|--|----------------------------|
| <b>Data Collection</b>                   |  | PDB: 6V3R                  |
| Wavelength (Å)                           |  | 0.9792                     |
| Resolution range (Å)                     |  | 102.4 - 2.66 (2.76 - 2.66) |
| Space group                              |  | C2                         |
| Unit cell a, b, c (Å)                    |  | 217.2, 124.4, 136.5        |
| $\alpha, \beta, \gamma$ (°)              |  | 90, 123.8, 90              |
| Total reflections                        |  | 262,849 (22,097)           |
| Unique reflections                       |  | 84,726 (7,446)             |
| Multiplicity                             |  | 3.1 (3.0)                  |
| Completeness (%)                         |  | 98.0 (85.9)                |
| Mean $I/\sigma(I)$                       |  | 8.43 (1.05)                |
| Wilson B-factor (Å <sup>2</sup> )        |  | 43.03                      |
| R-merge                                  |  | 0.1566 (1.074)             |
| CC <sub>1/2</sub>                        |  | 0.988 (0.513)              |
| CC*                                      |  | 0.997 (0.823)              |
| <b>Refinement</b>                        |  |                            |
| R <sub>work</sub> /R <sub>free</sub> (%) |  | 22.7/26.7 (36.5/38.9)      |
| Number of atoms                          |  | 18,844                     |

|                                                   |                |
|---------------------------------------------------|----------------|
| protein/ligands/water                             | 17,996/532/316 |
| Protein residues                                  | 2,208          |
| Root Mean Square bonds/angles (Å <sup>2</sup> /°) | 0.01/0.78      |
| Ramachandran favored /outlier (%)                 | 96/0.18        |
| Average B-factor (Å <sup>2</sup> )                | 50             |
| protein/ligands/water                             | 49.9/58.3/40.3 |

---

\*Number of crystals for both datasets = 1; the values in parentheses are

for the highest resolution shell;  $R_{merge} = \frac{\sum_{hkl} \sum_i |I_i(hkl) - \overline{I_i(hkl)}|}{\sum_{hkl} \sum_i I_i(hkl)} \times 100\%$ ;  $R =$

$\frac{\sum_{hkl} (|F_o| - |F_c|)}{\sum_{hkl} |F_o|} \times 100\%$ , where  $F_o$  and  $F_c$  are the observed and calculated

structure factors, and  $R_{free}$  is the value from the test set (3.0% of all reflections).
